# Supplementary material for: The Complete Chloroplast Genomes of Gynostemma Reveal the Phylogenetic Relationships of Species within the Genus
Source: MDPI journal article supplement (doi:10.3390/genes14040929), 2023-04-17
Supplement: s1 [file s1]

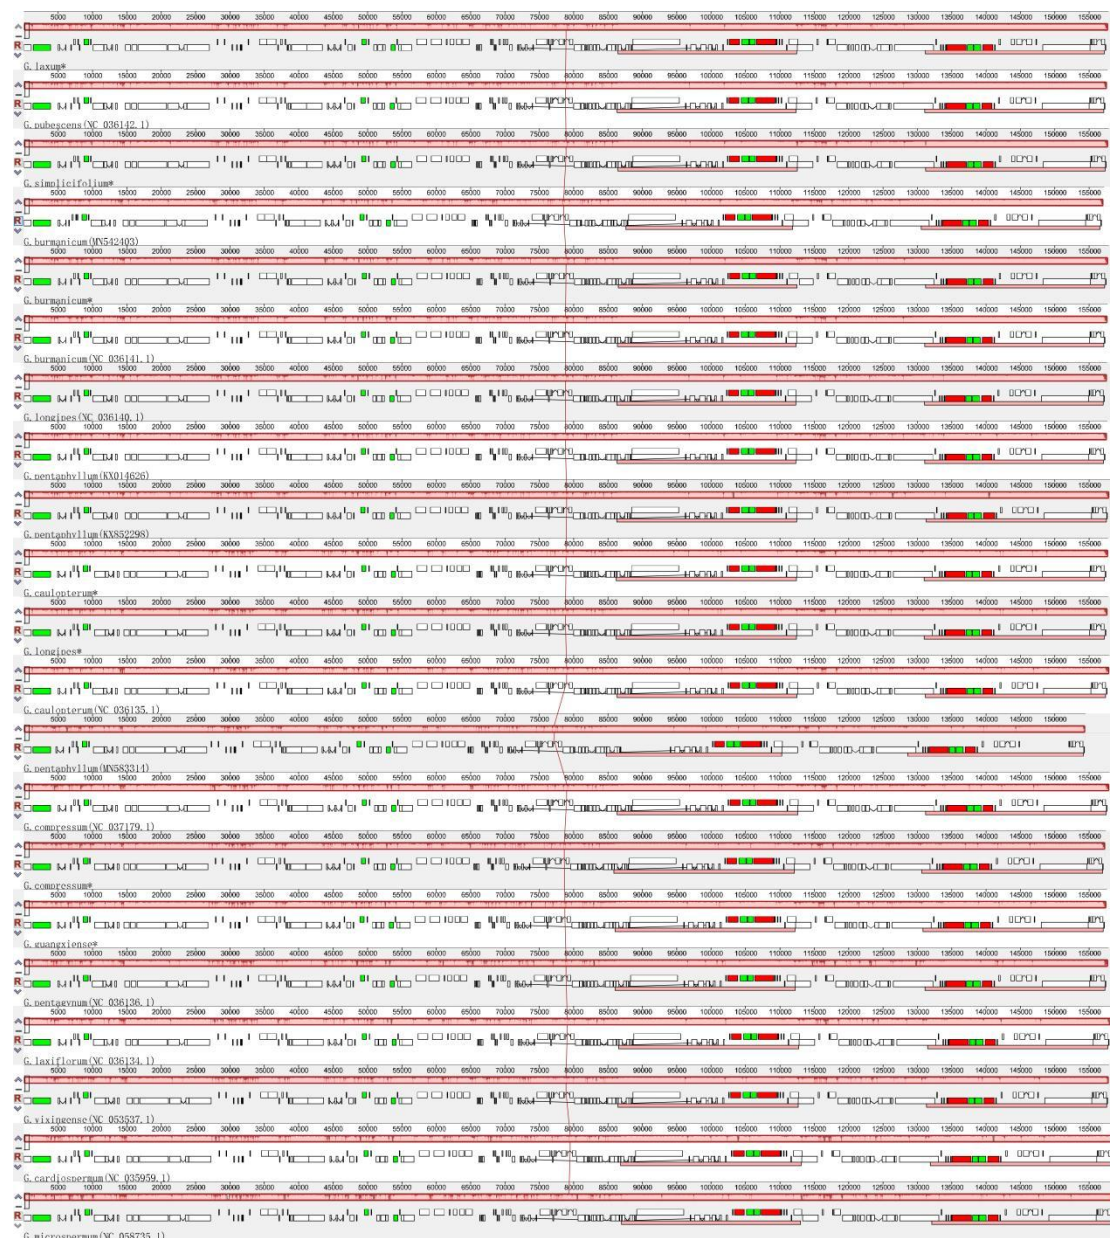

**Figure S1.** MAUVE alignment of chloroplast genomes of 21 individuals of the genus *Gynostemma*. The differently coloured squares represent different types of genes. Black represents transfer RNAs (tRNAs), and green represents tRNAs with introns (rRNAs). Red represents ribosomal RNA, while white represents protein-coding genes.

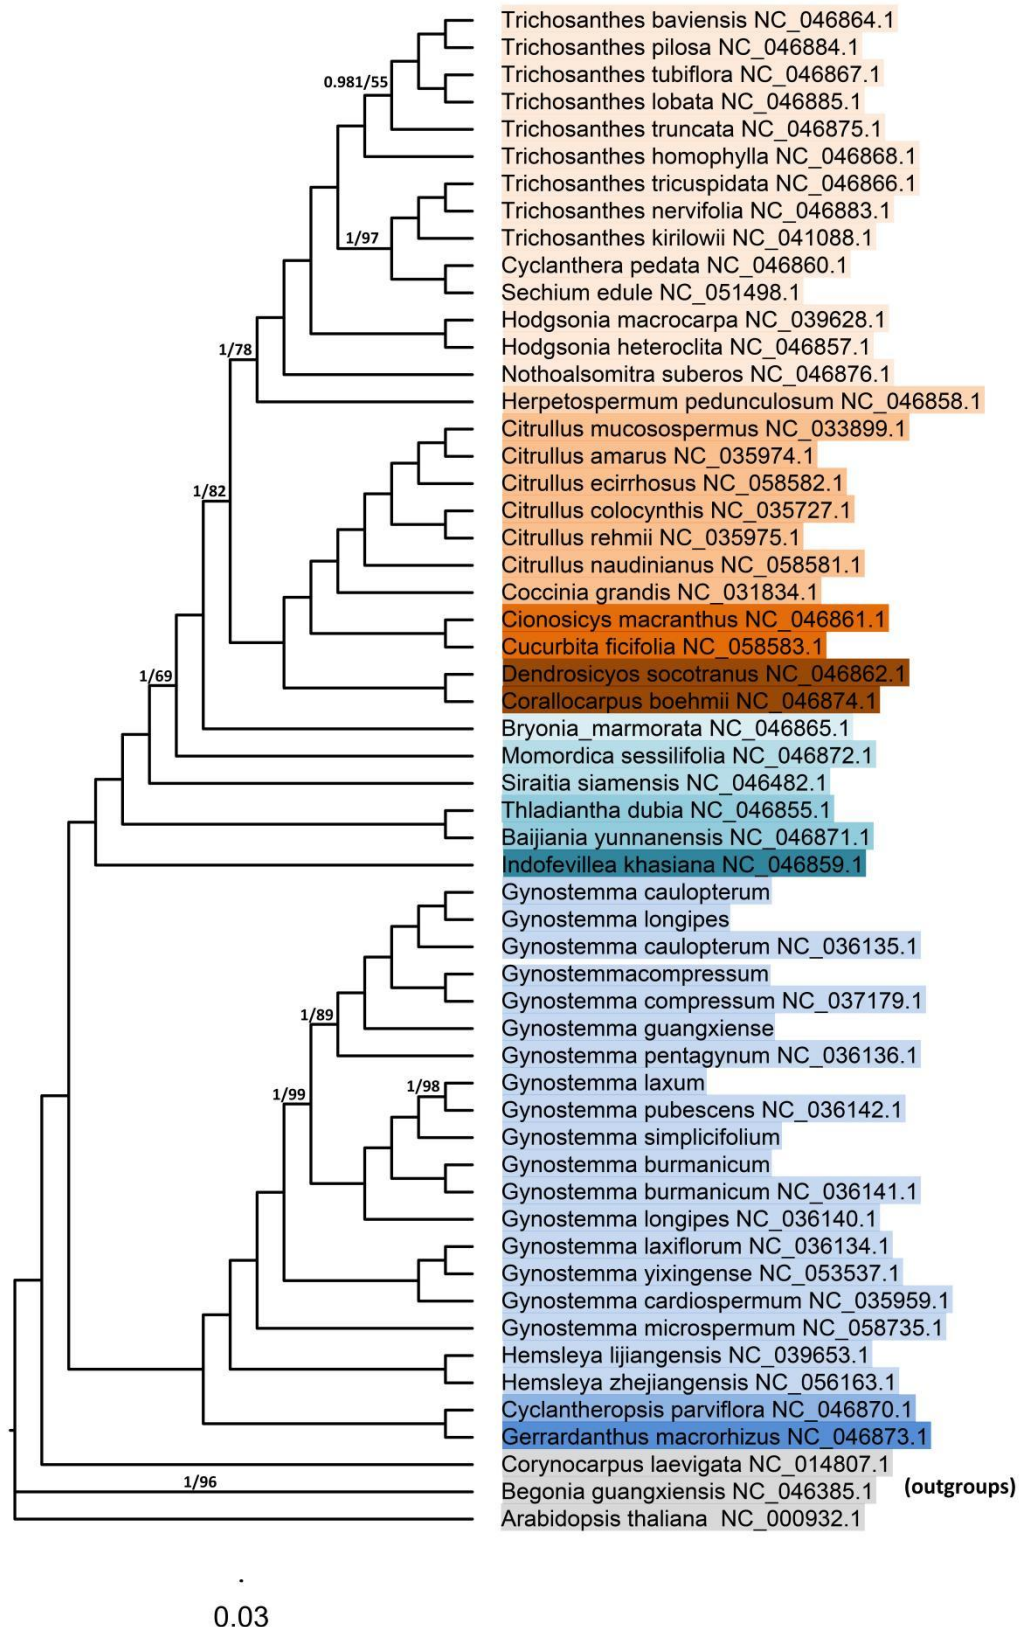

**Figure S2.** Phylogenetic trees were generated using maximum likelihood (ML) and Bayesian (BI) methods on the basis of 53 *Cucurbitaceae* chloroplast genomic CDS regions. ML trees and BI trees have the same topology. Bayesian posterior probabilities/ML bootstrap values are shown on the nodes and values of 1/100 are unlabelled. Different colours indicate as different tribes according to the APG IV classification system.
