# Supplementary material for: The Complete Chloroplast Genomes of Gynostemma Reveal the Phylogenetic Relationships of Species within the Genus
Source: Genes (Basel). 2023 Apr 17;14(4):929. doi: 10.3390/genes14040929 (PMC10138119; doi:10.3390/genes14040929)
Supplement: Supplementary file 1 [file genes-14-00929-s001.zip › Supplementary Files Table.xlsx]

## Sheet: Table S1
	Table S1. Sample collection information.
voucher specimen	species	Accession number	Location	Location details	Geographical coordinate
GXJGL001	Gynostemma guangxiense X.X.Chen & D.H.Qin	ON872373	Chongzuo City, Guangxi Zhuang Autonomous Region	Longrui Conservation Station, Guangxi Langgang National Nature Reserve, Ningming County	22º15′19″N,107º03′58″W
GYJGL010	Gynostemma laxum (Wall.) Cogn.	ON872374	Baise City, Guangxi Zhuang Autonomous Region	Guangxi Jinzhongshan Syrmaticus humiae Pheasant National Nature Reserve, Longlin County	24º48′50″N,105º19′34″W
BGJGL001	Gynostemma compressum X.X.Chen & D.R.Liang	ON872372	Guilin City, Guangxi Zhuang Autonomous Region	Guilin Botanical Garden	25º04′98″N,110º18′21″W
CJJGL002	Gynostemma caulopterum S.Z.He	ON872371	Baise City, Guangxi Zhuang Autonomous Region	Xinhua Town, Leye County	24º51′36″N,106º22′39″W
MDJGL002	Gynostemma burmanicum King ex Chakr.	ON872370	Dehong Dai and Jingpo Autonomous Prefecture,Yunnan Province	Ruili City	24º03′14″N,97º39′19″W
CGJGL002	Gynostemma longipes C. Y. Wu ex C. Y. Wu et S. K. Chen	ON872375	Guilin City, Guangxi Zhuang Autonomous Region	Guilin Seven Star Park	25º16′17″N,110º18′42″W
j3-3（JGL-1）	Gynostemma simplicifolium Blume	ON872376	Xishuangbanna Dai Autonomous Prefecture, Yunnan Province	Bulangshan Township, Menghai County	21°38′40″N,100°09′49″W

## Sheet: Table S2
		Table S2. Sequencing quality of seven species of the genus Gynostemma.
Species	Reads_number	Base_number	BRD-ID	≥Q30	GC Content
Gynostemma_burmanicum	40196040	6029406000	FKDL210380647-1a-A68	91.01	34.86
Gynostemma_caulopterum	42150242	6322536300	FKDL210380647-1a-A67	90.82	34.3
Gynostemma_guangxiense	44756598	6713489700	FKDL210380647-1a-A64	90.83	35.31
Gynostemma_compressum	38889214	5833382100	FKDL210380647-1a-A66	90.62	36.37
Gynostemma_laxum	43679562	6551934300	FKDL210380647-1a-A65	90.92	34.56
Gynostemma_longipes	37946688	5692003200	FKDL210380647-1a-A69	91.22	34.7

## Sheet: Table S3
	Table S3. List of species and their accession numbers in GenBank included in this study.
	sepecies	Accession number
1	Gynostemma burmanicum (nom. inval.)	NC_036141
2	Gynostemma pubescens	NC_036142
3	Gynostemma longipes	NC_036140
4	Gynostemma pentagynum	NC_036136
5	Gynostemma caulopterum	NC_036135
6	Gynostemma laxiflorum	NC_036134
7	Gynostemma cardiospermum	NC_035959
8	Gynostemma microspermum	NC_058735
9	Gynostemma yixingense	NC_053537
10	Gynostemma compressum	NC_037179
11	Gynostemma burmanicum (nom. inval.)	MN542403
12	Gynostemma pentaphyllum	KX014626
13	Gynostemma pentaphyllum	KX852298
14	Gynostemma pentaphyllum	MN583314
15	Citrullus naudinianus	NC_058581
16	Citrullus rehmii	NC_035975
17	Citrullus mucosospermus	NC_033899
18	Citrullus amarus	NC_035974
19	Citrullus colocynthis	NC_035727
20	Citrullus ecirrhosus	NC_058582
21	Trichosanthes tricuspidata	NC_046866
22	Trichosanthes homophylla	NC_046868
23	Trichosanthes nervifolia	NC_046883
24	Trichosanthes pilosa	NC_046884
25	Trichosanthes baviensis	NC_046864
26	Trichosanthes lobata	NC_046885
27	Trichosanthes kirilowii	NC_041088
28	Trichosanthes tubiflora	NC_046867
29	Trichosanthes truncata	NC_046875
30	Cucurbita ficifolia	NC_058583
31	Hemsleya zhejiangensis	NC_056163
32	Sechium edule	NC_051498
33	Momordica sessilifolia	NC_046872
34	Bryonia marmorata	NC_046865
35	Baijiania yunnanensis	NC_046871
36	Indofevillea khasiana	NC_046859
37	Cionosicys macranthus	NC_046861
38	Corallocarpus boehmii	NC_046874
39	Gerrardanthus macrorhizus	NC_046873
40	Herpetospermum pedunculosum	NC_046858
41	Hodgsonia heteroclita	NC_046857
42	Nothoalsomitra suberosa	NC_046876
43	Cyclantheropsis parviflora	NC_046870
44	Cyclanthera pedata	NC_046860
45	Thladiantha dubia	NC_046855
46	Dendrosicyos socotranus	NC_046862
47	Siraitia siamensis	NC_046482
48	Hemsleya lijiangensis	NC_039653
49	Hodgsonia macrocarpa	NC_039628
50	Coccinia grandis	NC_031834
51	Begonia guangxiensis	NC_046385
52	Corynocarpus laevigatus	NC_014807
53	Cucumis sativus	NC_007144
53	Arabidopsis thaliana	NC_000932

## Sheet: Table S4
	Table S4. Basic characteristics of the chloroplast genomes of 21 individuals of the genus Gynostemma.
Species	Accession number	Length(bp)					Gene number						CG content(%)
		Total	LSC	SSC	IR		Total	Protein coding	rRNA	tRNA	IR regions		Total	LSC	SSC	IR
G.guangxiense	ON872373	157590	86007	18545	26278		133	87	8	37	35		36.98	34.8	30.84	42.74
G.laxum	ON872374	157787	86426	18630	26114		133	87	8	37	35		36.98	34.86	30.64	42.8
G.compressum	ON872372	157419	85831	18522	26295		133	87	8	37	35		36.98	34.79	30.76	42.78
G.caulopterum	ON872371	157767	86194	18510	26293		133	87	8	37	35		36.96	34.75	30.84	42.78
G.burmanicum	ON872370	157834	86470	18627	26114		133	87	8	37	35		36.97	34.85	30.66	42.79
G.longipes	ON872375	157765	86188	18513	26293		133	87	8	37	35		36.96	34.75	30.82	42.78
G.simplicifolium	ON872376	157840	86425	18636	26138		133	87	8	37	35		36.97	34.87	30.66	42.77
Gynostemma burmanicum	NC_036141.1	157687	86835	18624	26114		133	87	8	37	35		37	34.88	30.69	42.79
Gynostemma pubescens	NC_036142.1	157666	86811	18627	26114		133	87	8	37	35		36.99	34.88	30.68	42.79
Gynostemma longipes	NC_036140.1	157601	86780	18647	26087		133	87	8	37	35		36.97	34.86	30.62	42.8
Gynostemma pentagynum	NC_036136.1	157791	86502	18869	26210		133	87	8	37	35		36.95	34.86	30.56	42.75
Gynostemma caulopterum	NC_036135.1	157937	86776	18583	26289		133	87	8	37	35		37	34.84	30.81	42.76
Gynostemma laxiflorum	NC_036134.1	158273	87047	18708	26259		133	87	8	37	35		36.97	34.83	30.66	42.8
Gynostemma cardiospermum	NC_035959.1	159042	87578	18716	26374		133	87	8	37	35		36.92	34.71	30.63	42.84
Gynostemma microspermum	NC_058735.1	158692	87452	19068	26086		133	87	8	37	35		36.88	34.73	30.65	42.81
Gynostemma yixingense	NC_053537.1	157910	86791	18635	26242		133	87	8	37	35		36.94	34.77	30.61	42.79
Gynostemma compressum	NC_037179.1	157960	86810	18560	26295		133	87	8	37	35		36.98	34.82	30.78	42.76
Gynostemma burmanicum	MN542403.1	157153	86278	18647	26114		133	87	8	37	35		37.01	34.89	30.65	42.79
Gynostemma pentaphyllum	KX014626.1	157654	86790	18654	26214		133	87	8	37	35		36.96	34.82	30.6	42.8
Gynostemma pentaphyllum	KX852298.1	158004	86765	18811	26214		133	87	8	37	35		36.97	34.83	30.48	42.86
Gynostemma pentaphyllum	MN583314.1	154457	84998	18253	25603		133	87	8	37	35		37.06	34.89	30.86	42.86

## Sheet: Table S5
	Table S5. Number of codons and RSCU values of the chloroplast genomes of seven Gynostemma genus.
			G.burmanicum		G.caulopterum		G.compressum		G.guangxiense		G.laxum		G.longipes		G.simplicifolium
Codon	AA	Symbol	RSCU	Number	RSCU	Number	RSCU	Number	RSCU	Number	RSCU	Number	RSCU	Number	RSCU	Number
TAA	*	Ter	1.92	55	1.884	54	1.884	54	1.884	54	1.92	55	1.884	54	1.92	55
TAG	*	Ter	0.522	15	0.522	15	0.522	15	0.522	15	0.522	15	0.522	15	0.522	15
TGA	*	Ter	0.558	16	0.594	17	0.594	17	0.594	17	0.558	16	0.594	17	0.558	16
GCA	A	Ala	1.084	372	1.084	373	1.088	374	1.084	373	1.084	373	1.084	373	1.08	372
GCC	A	Ala	0.644	221	0.636	219	0.632	217	0.636	219	0.644	222	0.636	219	0.644	222
GCG	A	Ala	0.428	147	0.436	150	0.44	151	0.44	151	0.432	149	0.436	150	0.432	149
GCT	A	Ala	1.848	635	1.844	634	1.84	633	1.836	631	1.84	634	1.84	632	1.844	635
TGC	C	Cys	0.48	75	0.476	74	0.478	74	0.48	75	0.48	75	0.478	74	0.48	75
TGT	C	Cys	1.52	238	1.524	237	1.522	236	1.52	238	1.52	237	1.522	236	1.52	237
GAC	D	Asp	0.382	206	0.374	203	0.376	204	0.38	207	0.38	206	0.376	204	0.38	206
GAT	D	Asp	1.618	875	1.626	885	1.624	884	1.62	882	1.62	878	1.624	884	1.62	878
GAA	E	Glu	1.49	1040	1.496	1048	1.498	1048	1.496	1046	1.49	1042	1.496	1048	1.488	1043
GAG	E	Glu	0.51	356	0.504	353	0.502	352	0.504	352	0.51	356	0.504	353	0.512	358
TTC	F	Phe	0.708	533	0.694	531	0.698	536	0.702	536	0.704	535	0.694	531	0.702	534
TTT	F	Phe	1.292	973	1.306	998	1.302	998	1.298	993	1.296	986	1.306	998	1.298	988
GGA	G	Gly	1.608	722	1.612	725	1.608	723	1.596	716	1.608	725	1.612	725	1.612	727
GGC	G	Gly	0.388	174	0.392	176	0.392	176	0.396	178	0.384	174	0.392	176	0.384	174
GGG	G	Gly	0.648	290	0.648	292	0.648	291	0.66	296	0.644	291	0.648	292	0.644	290
GGT	G	Gly	1.356	608	1.348	606	1.352	607	1.348	606	1.36	614	1.348	606	1.36	613
CAC	H	His	0.456	145	0.454	145	0.454	146	0.454	146	0.456	145	0.45	144	0.456	145
CAT	H	His	1.544	490	1.546	494	1.546	496	1.546	496	1.544	490	1.55	495	1.544	490
ATA	I	Ile	0.957	729	0.96	736	0.957	732	0.954	732	0.957	735	0.96	735	0.96	737
ATC	I	Ile	0.603	459	0.594	455	0.597	456	0.597	457	0.597	459	0.594	455	0.597	459
ATT	I	Ile	1.443	1100	1.443	1106	1.446	1107	1.449	1111	1.443	1108	1.446	1107	1.443	1108
AAA	K	Lys	1.506	1104	1.496	1096	1.5	1102	1.498	1100	1.504	1101	1.496	1096	1.506	1105
AAG	K	Lys	0.494	362	0.504	370	0.5	368	0.502	369	0.496	363	0.504	370	0.494	362
CTA	L	Leu	0.81	379	0.816	382	0.816	382	0.81	380	0.81	381	0.816	382	0.81	381
CTC	L	Leu	0.426	199	0.408	192	0.414	194	0.408	192	0.426	199	0.408	192	0.426	199
CTG	L	Leu	0.384	179	0.396	185	0.396	185	0.39	183	0.378	177	0.396	185	0.378	178
CTT	L	Leu	1.278	596	1.266	594	1.266	592	1.272	596	1.278	598	1.266	594	1.272	598
TTA	L	Leu	1.878	879	1.884	882	1.896	888	1.89	885	1.884	883	1.884	882	1.884	884
TTG	L	Leu	1.224	572	1.23	575	1.212	566	1.218	571	1.23	576	1.23	575	1.224	575
ATG	M	Met	1	625	1	625	1	626	1	624	1	626	1	625	1	624
AAC	N	Asn	0.47	305	0.456	295	0.456	294	0.458	296	0.468	305	0.456	295	0.468	306
AAT	N	Asn	1.53	994	1.544	997	1.544	997	1.542	998	1.532	999	1.544	997	1.532	1003
CCA	P	Pro	1.116	305	1.116	303	1.1	300	1.104	300	1.116	305	1.116	303	1.116	305
CCC	P	Pro	0.828	227	0.848	230	0.844	230	0.848	230	0.824	226	0.844	229	0.828	227
CCG	P	Pro	0.544	149	0.528	143	0.528	144	0.528	144	0.544	149	0.528	143	0.544	149
CCT	P	Pro	1.512	414	1.512	411	1.524	415	1.52	413	1.516	415	1.516	412	1.512	413
CAA	Q	Gln	1.55	723	1.548	724	1.544	723	1.546	722	1.548	724	1.548	724	1.548	725
CAG	Q	Gln	0.45	210	0.452	212	0.456	213	0.454	212	0.452	212	0.452	212	0.452	212
AGA	R	Arg	1.83	485	1.818	482	1.818	483	1.824	486	1.83	486	1.812	482	1.83	487
AGG	R	Arg	0.654	173	0.66	175	0.666	177	0.666	178	0.642	171	0.66	175	0.648	172
CGA	R	Arg	1.41	374	1.434	381	1.434	381	1.422	379	1.416	376	1.434	381	1.41	375
CGC	R	Arg	0.384	101	0.372	99	0.372	99	0.372	99	0.384	102	0.372	99	0.39	103
CGG	R	Arg	0.402	107	0.402	107	0.396	106	0.414	110	0.402	107	0.402	107	0.408	108
CGT	R	Arg	1.32	350	1.314	349	1.308	348	1.308	349	1.326	352	1.32	350	1.314	350
AGC	S	Ser	0.372	127	0.378	131	0.378	130	0.378	130	0.372	127	0.378	131	0.366	126
AGT	S	Ser	1.17	402	1.176	405	1.176	405	1.176	406	1.176	403	1.176	405	1.17	403
TCA	S	Ser	1.248	428	1.248	430	1.254	432	1.248	432	1.242	427	1.248	430	1.248	428
TCC	S	Ser	0.966	332	0.966	332	0.966	334	0.96	332	0.972	334	0.966	333	0.966	333
TCG	S	Ser	0.576	198	0.576	199	0.576	198	0.588	204	0.576	198	0.576	199	0.582	199
TCT	S	Ser	1.668	572	1.65	568	1.656	571	1.65	571	1.668	572	1.65	568	1.668	573
ACA	T	Thr	1.228	418	1.224	420	1.224	420	1.216	418	1.232	421	1.224	420	1.228	420
ACC	T	Thr	0.748	255	0.764	262	0.76	261	0.756	260	0.748	256	0.764	262	0.748	256
ACG	T	Thr	0.452	154	0.452	155	0.456	156	0.456	156	0.448	153	0.452	155	0.448	153
ACT	T	Thr	1.572	536	1.56	535	1.564	537	1.572	540	1.572	538	1.56	536	1.576	538
GTA	V	Val	1.508	542	1.508	548	1.512	549	1.516	551	1.508	546	1.508	548	1.512	548
GTC	V	Val	0.496	178	0.496	181	0.496	180	0.496	180	0.496	179	0.496	181	0.492	179
GTG	V	Val	0.544	195	0.54	196	0.544	198	0.54	196	0.54	195	0.54	196	0.54	196
GTT	V	Val	1.456	524	1.456	529	1.448	527	1.448	527	1.456	527	1.456	529	1.452	527
TGG	W	Trp	1	472	1	474	1	475	1	473	1	474	1	474	1	474
TAC	Y	Tyr	0.416	207	0.436	220	0.432	217	0.434	217	0.422	212	0.436	220	0.422	212
TAT	Y	Tyr	1.584	788	1.564	787	1.568	788	1.566	784	1.578	792	1.564	787	1.578	791

## Sheet: Table S6
	Table S6. Prediction of RNA editing sites of the chloroplast genomes of seven Gynostemma genus.																		Table S6: Prediction of RNA editing sites of the chloroplast genomes of seven Gynostemma genus
	Gynostemma_burmanicum					Gynostemma_caulopterum					Gynostemma_compressum					Gynostemma_guangxiense					Gynostemma_laxum					Gynostemma_longipes					Gynostemma_simplicifolium
	Nt Pos	AA Pos	Align Col	Effect	Score	Nt Pos	AA Pos	Align Col	Effect	Score	Nt Pos	AA Pos	Align Col	Effect	Score	Nt Pos	AA Pos	Align Col	Effect	Score	Nt Pos	AA Pos	Align Col	Effect	Score	Nt Pos	AA Pos	Align Col	Effect	Score	Nt Pos	AA Pos	Align Col	Effect	Score
rps19	160	54	76	CAT (H) => TAT (Y)	1	160	54	76	CAT (H) => TAT (Y)	1	160	54	76	CAT (H) => TAT (Y)	1	160	54	76	CAT (H) => TAT (Y)	1	160	54	76	CAT (H) => TAT (Y)	1	160	54	76	CAT (H) => TAT (Y)	1	160	54	76	CAT (H) => TAT (Y)	1
rps14	149	50	53	CCA (P) => CTA (L)	1	149	50	53	CCA (P) => CTA (L)	1	149	50	53	CCA (P) => CTA (L)	1	149	50	53	CCG (P) => CTG (L)	1	149	50	53	CCA (P) => CTA (L)	1	149	50	53	CCA (P) => CTA (L)	1	149	50	53	CCA (P) => CTA (L)	1
	247	83	86	CTT (L) => TTT (F)	1	247	83	86	CTT (L) => TTT (F)	1	247	83	86	CTT (L) => TTT (F)	1	247	83	86	CTT (L) => TTT (F)	1	247	83	86	CTT (L) => TTT (F)	1	247	83	86	CTT (L) => TTT (F)	1	247	83	86	CTT (L) => TTT (F)	1
rps12	221	74	74	TCA (S) => TTA (L)	0.88	221	74	74	TCA (S) => TTA (L)	0.88	221	74	74	TCA (S) => TTA (L)	0.88	221	74	74	TCA (S) => TTA (L)	0.88	91	31	36	CAT (H) => TAT (Y)	1	221	74	74	TCA (S) => TTA (L)	0.88	91	31	36	CAT (H) => TAT (Y)	1
rps11	91	31	36	CAT (H) => TAT (Y)	1	91	31	36	CAT (H) => TAT (Y)	1	91	31	36	CAT (H) => TAT (Y)	1	91	31	36	CAT (H) => TAT (Y)	1	272	91	96	GCA (A) => GTA (V)	1	91	31	36	CAT (H) => TAT (Y)	1	272	91	96	GCA (A) => GTA (V)	1
	272	91	96	GCA (A) => GTA (V)	1	272	91	96	GCA (A) => GTA (V)	1	272	91	96	GCA (A) => GTA (V)	1	272	91	96	GCA (A) => GTA (V)	1	293	98	103	CCT (P) => CTT (L)	1	272	91	96	GCA (A) => GTA (V)	1	293	98	103	CCT (P) => CTT (L)	1
	293	98	103	CCT (P) => CTT (L)	1	293	98	103	CCT (P) => CTT (L)	1	293	98	103	CCT (P) => CTT (L)	1	293	98	103	CCT (P) => CTT (L)	1						293	98	103	CCT (P) => CTT (L)	1
rps4	20	7	17	CCT (P) => CTT (L)	1	20	7	17	CCT (P) => CTT (L)	1	20	7	17	CCT (P) => CTT (L)	1	20	7	17	CCT (P) => CTT (L)	1	20	7	17	CCT (P) => CTT (L)	1	20	7	17	CCT (P) => CTT (L)	1	20	7	17	CCT (P) => CTT (L)	1
	83	28	41	ACC (T) => ATC (I)	0.83	83	28	41	ACC (T) => ATC (I)	0.83	83	28	41	ACC (T) => ATC (I)	0.83	83	28	41	ACC (T) => ATC (I)	0.83	83	28	41	ACC (T) => ATC (I)	0.83	83	28	41	ACC (T) => ATC (I)	0.83	83	28	41	ACC (T) => ATC (I)	0.83
	602	201	374	ACT (T) => ATT (I)	1	496	166	221	CTT (L) => TTT (F)	1	496	166	221	CTT (L) => TTT (F)	1	602	201	374	ACT (T) => ATT (I)	1	602	201	374	ACT (T) => ATT (I)	1	496	166	221	CTT (L) => TTT (F)	1	602	201	374	ACT (T) => ATT (I)	1
						503	168	223	CCA (P) => CTA (L)	0.83	503	168	223	CCA (P) => CTA (L)	0.83											503	168	223	CCA (P) => CTA (L)	0.83
rps3	553	185	544	CCT (P) => TCT (S)	1	553	185	544	CCT (P) => TCT (S)	1	553	185	544	CCT (P) => TCT (S)	1	553	185	544	CCT (P) => TCT (S)	1	553	185	544	CCT (P) => TCT (S)	1	553	185	544	CCT (P) => TCT (S)	1	553	185	544	CCT (P) => TCT (S)	1
rpl16	34	12	53	CAC (H) => TAC (Y)	1	34	12	53	CAC (H) => TAC (Y)	1	34	12	53	CAC (H) => TAC (Y)	1	34	12	53	CAC (H) => TAC (Y)	1	34	12	53	CAC (H) => TAC (Y)	1	34	12	53	CAC (H) => TAC (Y)	1	34	12	53	CAC (H) => TAC (Y)	1
	391	131	184	CTC (L) => TTC (F)	0.89	391	131	184	CTC (L) => TTC (F)	0.89	391	131	184	CTC (L) => TTC (F)	0.89	391	131	184	CTC (L) => TTC (F)	0.89	391	131	184	CTC (L) => TTC (F)	0.89	391	131	184	CTC (L) => TTC (F)	0.89	391	131	184	CTC (L) => TTC (F)	0.89
rpl2	146	49	58	GCA (A) => GTA (V)	1	146	49	58	GCA (A) => GTA (V)	1	146	49	58	GCA (A) => GTA (V)	1	146	49	58	GCA (A) => GTA (V)	1	146	49	58	GCA (A) => GTA (V)	1	146	49	58	GCA (A) => GTA (V)	1	146	49	58	GCA (A) => GTA (V)	1
psbL	2	1	1	ACG (T) => ATG (M)	1	2	1	1	ACG (T) => ATG (M)	1	2	1	1	ACG (T) => ATG (M)	1	2	1	1	ACG (T) => ATG (M)	1	2	1	1	ACG (T) => ATG (M)	1	2	1	1	ACG (T) => ATG (M)	1	2	1	1	ACG (T) => ATG (M)	1
ndhD	2	1	1	ACG (T) => ATG (M)	1	2	1	1	ACG (T) => ATG (M)	1	2	1	1	ACG (T) => ATG (M)	1	2	1	1	ACG (T) => ATG (M)	1	2	1	1	ACG (T) => ATG (M)	1	2	1	1	ACG (T) => ATG (M)	1	2	1	1	ACG (T) => ATG (M)	1

## Sheet: Table S7
	Table S7. Seven newly sequenced simple repeat sequences (SSRs) of the Gynostemma chloroplast genome.
Genomes	Repeat units	Number	Location			Region
			Intron	IGS	CDS	LSC	SSC	IR
G.guangxiense	A/T	43	6	27	10	33	6	4
	C/G	1		1		1
	AT/AT	5	1	3	1	4	1
	AAT/ATT	6		6		5	1
	ATC/ATG	1		1		1
	AAAT/ATTT	3		1	2	1		2
G.laxum	A/T	43	7	25	11	34	7	2
	C/G	2		2		2
	AT/AT	5	1	3	1	4	1
	AAG/CTT	1			1	1
	AAT/ATT	5		5		4	1
	AAAT/ATTT	3		1	2	3
G.compressum	A/T	43	8	25	10	34	7	2
	AT/AT	7	1	5	1	6	1
	AAT/ATT	3		3		2	1
	ATC/ATG	1		1		1
	AAAT/ATTT	3		1	2	1		2
G.caulopterum	A/T	50	9	30	11	38	8	4
	C/G	1		1		1
	AT/AT	6	1	4	1	5	1
	AAT/ATT	6		6		5	1
	ATC/ATG	1		1		1
	AAAT/ATTT	3		1	2	1		2
G.burmanicum	A/T	48	6	31	11	40	8
	C/G	2	1	1		2
	AT/AT	5	1	3	1	4	1
	AAG/CTT	1			1	1
	AAT/ATT	5		5		5	2
	AAAT/ATTT	3		1	2	1		2
G.longipes	A/T	52	10	31	11	38	8	6
	C/G	3		3		3
	AT/AT	6	1	4	1	5	1
	AAT/ATT	6		6		5	1
	ATC/ATG	1		1		1
	AAAT/ATTT	3		1	2	1		2
G.simplicifolium	A/T	41	8	22	11	33	6	2
	C/G	1		1		1
	AT/AT	5	1	3	1	4	1
	AAG/CTT	1			1	1	2
	AAT/ATT	5		5		5
	AAAT/ATTT	3		1	2	1		2

## Sheet: Table S8
	Table S8. Ka, Ks and Ka/Ks values of genes of the genus Gynostemma.
gene	Ks	Ka	Ka/Ks
psbA	0.01782	0.00014	0.00785634
matK	0.02452	0.01062	0.433116
rps16	0.02964	0.00845	0.285088
psbK	0.02259	0.00156	0.0690571
psbI	0.01745	0.00903	0.517479
atpA	0.02143	0.00178	0.0830611
atpF	0.00689	0.00478	0.693759
atpH	0.00535	0	0
atpI	0.0105	0.00172	0.16381
rps2	0.00669	0.00254	0.379671
rpoC2	0.01485	0.00489	0.329293
rpoC1	0.01523	0.00517	0.339462
rpoB	0.00883	0.00446	0.505096
petN	0.00551	0.00166	0.30127
psbM	0.04024	0.00475	0.118042
psbD	0.01695	0.00014	0.00825959
psbC	0.01805	0.00158	0.0875346
psbZ	0.01231	0.00443	0.35987
rps14	0.0131	0.00048	0.0366412
psaB	0.01013	0.00088	0.0868707
psaA	0.01739	0.00039	0.0224267
pafI	0.00904	0.00202	0.223451
rps4	0.01094	0.00303	0.276965
ndhJ	0.01609	0.0003	0.0186451
ndhK	0.01094	0.00214	0.195612
ndhC	0.01289	0.00081	0.0628394
atpE	0.00546	0.00108	0.197802
atpB	0.01371	0.00075	0.0547046
rbcL	0.01262	0.00251	0.198891
accD	0.01495	0.00474	0.317057
psaI	0.00407	0	0
pafII	0.00942	0.00298	0.316348
cemA	0.0147	0.00545	0.370748
petA	0.01057	0.0056	0.529801
psbJ	0.0372	0.00337	0.0905914
psbL	0	0.00586	NA
psbF	0.01089	0.00127	0.116621
psbE	0.00742	0	0
petL	0.02009	0.01175	0.584868
petG	0.02065	0.00387	0.187409
psaJ	0.03686	0.00542	0.147043
rpl33	0.02035	0.00904	0.444226
rps18	0.01047	0.00898	0.857689
rpl20	0.01731	0.00871	0.503177
rps12	0	0.00121	NA
clpP	0.00871	0.0018	0.206659
psbB	0.01961	0.00155	0.0790413
psbT	0.00859	0.00138	0.160652
pbf1	0.00684	0	0
psbH	0.00584	0	0
petB	0.00655	0.00046	0.070229
petD	0.02323	0.00242	0.104176
rpoA	0.01214	0.00546	0.449753
rps11	0.02002	0.00204	0.101898
rpl36	0	0.00554	NA
rps8	0.01154	0.00503	0.435875
rpl14	0.0013	0.0024	1.84615
rpl16	0.00891	0.00171	0.191919
rps3	0.01512	0.00539	0.356481
rpl22	0.019	0.00571	0.300526
rps19	0.03338	0.00668	0.20012
rpl2	0.00358	0.00019	0.0530726
rpl23	0	0.00052	NA
ycf2	0.00287	0.00112	0.390244
ndhB	0.00261	0.00035	0.1341
rps12	0	0.00084	NA
orf70	0	0.00334	NA
ycf1	0.01095	0.0076	0.694064
ndhF	0.02428	0.01117	0.460049
rpl32	0.0196	0.00935	0.477041
ccsA	0.01806	0.00592	0.327796
ndhD	0.01656	0.00548	0.330918
psaC	0.01106	0.00286	0.25859
ndhE	0.01107	0.00448	0.404697
ndhG	0.01562	0.00329	0.210627
ndhI	0.01179	0.00247	0.2095
ndhA	0.01982	0.0039	0.196771
ndhH	0.015	0.00373	0.248667
rps15	0.03249	0.01171	0.360419
ycf1	0.01231	0.011	0.893582
orf70	0	0.00334	NA
rps12	0	0.00121	NA
rps7	0	0.00084	NA
ndhB	0.00261	0.00035	0.1341
ycf2	0.00287	0.00112	0.390244
rpl23	0	0.00052	NA
rpl2	0.0037	0.00036	0.0972973
